# Supplementary material for: Comparison of Trapping Effects of Different Traps and Monitoring the Occurrence Dynamics of Spodoptera litura in Soybean Fields of Dangtu, Anhui Province, China
Source: MDPI journal article supplement (doi:10.3390/agronomy13010047), 2022-12-23
Supplement: s1 [file s1]

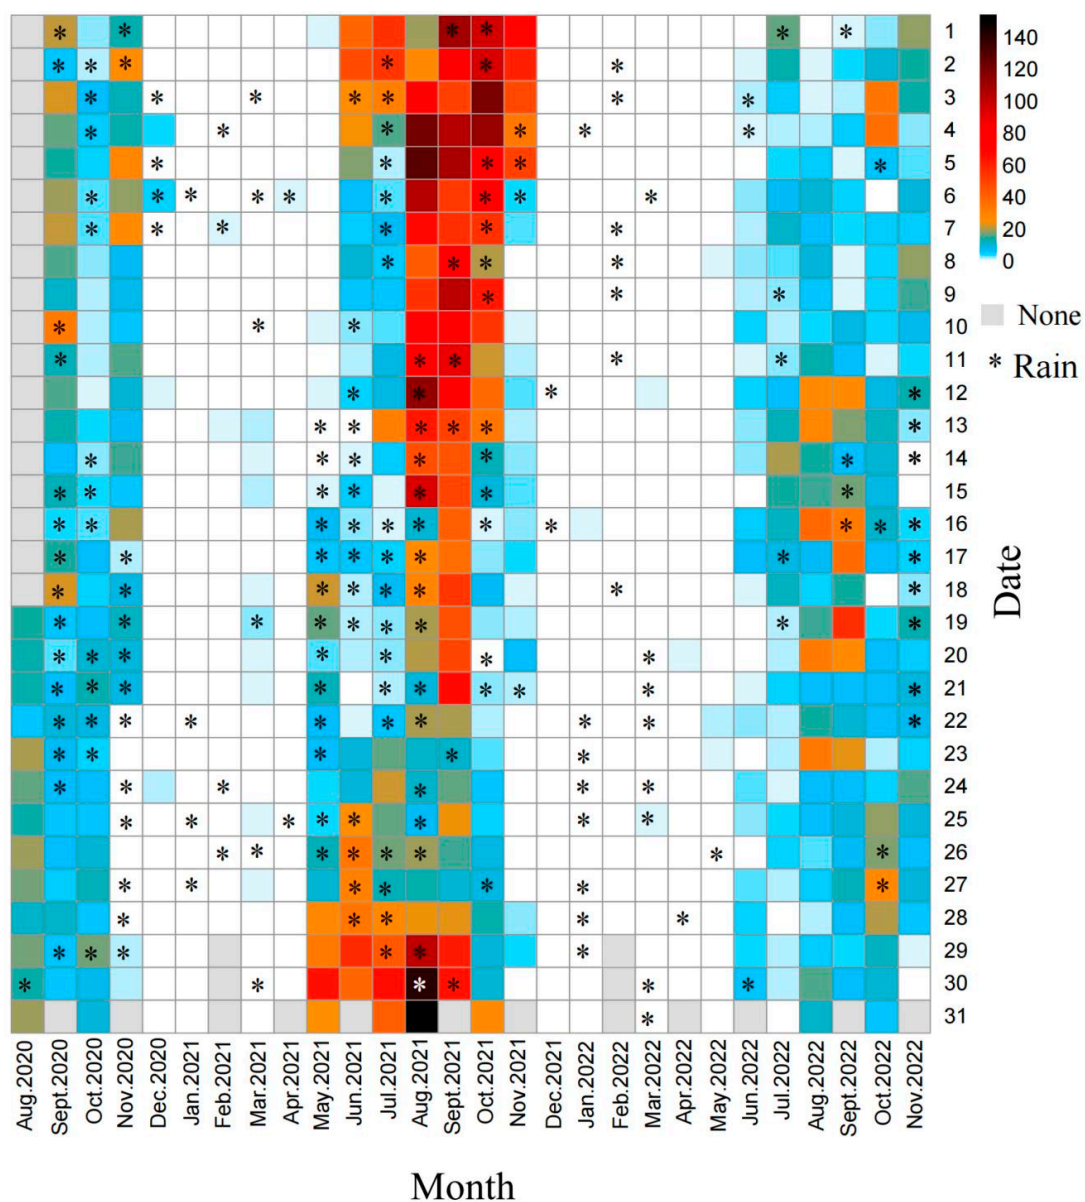

**Figure S1:** Heat map of trapped *S. litura* male moth and whether it rains per day after AIM installation. The \* indicates that it rained that day.
